1                   **Association of physiological variables with football subconcussive**

2                                   **head impacts: Why measure?**

3           Megan E. Huibregtse, B.S.<sup>1</sup>, Steven W. Zonner, D.O.<sup>2</sup>, Keisuke Ejima, Ph.D.<sup>3</sup>, Zachary W.

4                   Bevilacqua, M.S.<sup>1</sup>, Sharlene Newman, Ph.D.<sup>4,5</sup>, Jonathan T. Macy, Ph.D.<sup>6</sup>,

5                                   and Keisuke Kawata, Ph.D.<sup>1,5\*</sup>,

6           <sup>1</sup> Department of Kinesiology, School of Public Health, Indiana University, Bloomington, IN

7           <sup>2</sup> Department of Sports Medicine, Washington Township Medical Foundation, Union City, CA

8           <sup>3</sup> Department of Epidemiology and Biostatistics, School of Public Health, Indiana University,

9           Bloomington, IN

10          <sup>4</sup> Department of Psychological and Brain Sciences, College of Arts and Sciences, Indiana

11          University, Bloomington, IN

12          <sup>5</sup> Program in Neuroscience, College of Arts and Sciences, Indiana University, Bloomington, IN

13          <sup>6</sup> Department of Applied Health Science, School of Public Health, Indiana University,

14          Bloomington, IN

15  
16          \* Corresponding author

17          Email: [kkawata@indiana.edu](mailto:kkawata@indiana.edu) (KK)

18  
19  
20  
21          Running Title: Head impacts, muscle damage, and physical exertion

## 24 **Abstract**

25 Subconcussive head impacts, defined as impacts to the cranium that do not result in clinical  
26 symptoms of concussion, are gaining traction as a major public health concern. Researchers  
27 begin to suggest subconcussive impact-dependent changes in various neurological measures.  
28 However, a contribution of physiological factors such as physical exertion and muscle damage  
29 has never been accounted. We conducted a prospective longitudinal study during a high school  
30 American football season to examine the association between physiological factors and  
31 subconcussive head impact kinematics. Fifteen high-school American football players  
32 volunteered in the study. A sensor-installed mouthguard recorded the number of head impacts,  
33 peak linear (PLA:  $g$ ) and peak rotational (PRA:  $\text{rad/s}^2$ ) head accelerations from every practice  
34 and game. Serum samples were collected at 12 time points (pre-season baseline, five in-season  
35 pre-post games, and post-season) and assessed for the creatine kinase skeletal muscle-specific  
36 isoenzyme (CK-MM), as a surrogate for skeletal muscle damage. Physical exertion was  
37 estimated in the form of excess post-exercise oxygen consumption (EPOC) from heart rate data  
38 captured during five games via a wireless heart rate monitor. A total of 9,700 hits, 214,492  $g$ , and  
39 19,885,037  $\text{rad/s}^2$  were recorded from 15 players across the study period. Mixed-effect  
40 regression models indicated that head impact kinematics (frequency, PLA, and PRA) were  
41 significantly and positively associated with CK-MM increase, but not with EPOC. There was a  
42 significant and positive association between CK-MM and EPOC. These data suggest that skeletal  
43 muscle damage effects should be considered when using outcome measures that may have an  
44 interaction with muscle damage, including inflammatory biomarkers and vestibular/balance tests.

45

## 46 **Introduction**

47 Repetitive head impacts observed in sports have become one of the most complex public  
48 health issues. The majority of head impacts do not induce clinical signs and symptoms of  
49 concussion and are often referred as subconcussive head impacts [1]. Despite the individual  
50 being asymptomatic, these head impacts have the potential to cause insidious neurological  
51 deficits, if sustained repetitively over time [2, 3]. Emerging evidence has postulated that long-  
52 term exposure to repetitive subconcussive head impacts is a key predictor for the development of  
53 a neurodegenerative pathology called chronic traumatic encephalopathy (CTE) [4, 5]. However,  
54 such a cause and effect relationship can only be confirmed by a life-long longitudinal study,  
55 which has been deemed infeasible.

56 A number of studies have been conducted to examine neuronal responses to subconcussive  
57 impacts in both acute (several days) and subacute (several weeks) time frames, in addition to the  
58 chronic effects from an entire season. Collectively, subconcussive head impacts have shown to  
59 induce transient vestibular defect [6], lingering ocular-motor impairment [7, 8], acute and  
60 chronic elevations in blood biomarkers of neural injury [9, 10], and pronounced axonal diffusion  
61 over the course of a season [3, 11, 12]. A concern has been raised that virtually all reports to date  
62 were unable to account for potential confounding effects from vigorous exercise and muscle  
63 damage, with some papers listing this issue as a limitation [7, 10, 13, 14] as evidenced by the  
64 following quotes, while other papers simply failed to acknowledge it [15-17].

65 *“Further validation is needed to correlate systemic biomarkers to repetitive*  
66 *brain impacts, as opposed to the extracranial effects common to an athletic*  
67 *population such as exercise and muscle damage.” – Di Battista et al. 2016 [13]*

68 *“A lack of biomechanical, neuroimaging, and neuropsychological data limit*  
69 *our ability to determine if the elevations in serum neurofilament-light are a result*

70 *of axonal damage caused by head impacts or from another source, such as muscle.”*

71 – Oliver et al. 2016 [10]

72 During periods of physical exertion in a hot environment, the core body temperature can  
73 exceed 40°C (104°F) [18]. An animal study indicated that when animals sustained traumatic  
74 brain injury under hyperthermic conditions, there was greater neuronal cell death in the  
75 hippocampus compared to normothermic conditions [19]. In addition to the thermic effect of  
76 activity, intense exercise often triggers muscle damage, systemic inflammation, and fatigue,  
77 which may influence neurological variables including neurocognitive function [20], blood  
78 biomarker [21, 22], and balance [23]. If effects from physical exertion and muscle damage are  
79 associated with either subconcussive impact frequency/magnitude or neurological outcome  
80 variables, caution is warranted in interpreting the previous reports indicating subconcussive  
81 impact-dependent increase in neural injury blood biomarkers [9, 10, 16], neural network  
82 disruption [11, 12], and ocular-motor impairment [7]. Conversely, if such an interaction between  
83 the physiological factors and subconcussive head impacts does not exist, it is unnecessary to  
84 account for physiological factors in the causal inference of head impacts on brain damage.

85 Given that gold-standard neurological measurements for subclinical neural injury have  
86 not yet been established, we instead examined the association between physiological factors and  
87 subconcussive head impact kinematics in a prospective longitudinal study of high-school football  
88 players during a single season. For head impact kinematics, we employed a sensor-installed  
89 Vector mouthguard, whose kinematic accuracy has shown to be superior to helmet, skin patch  
90 and headband sensors [24-26], to record frequency and magnitude of head impacts from all  
91 practices and games. For physical exertion, we monitored players’ heart rate via wireless chest-  
92 strap heart-rate monitor and estimated players’ excess post-exercise oxygen consumption

93 (EPOC). EPOC is a well-accepted measurement in the field of exercise physiology to estimate  
94 the degree of “oxygen debt” during exercise, reflecting physiological load and energy  
95 metabolism [27]. For muscle damage, we collected blood samples at pre- and post-games from  
96 five in-season games and measured serum levels of creatine kinase (CK), particularly a skeletal  
97 muscle-specific isoenzyme (CK-MM), which has been considered an indirect surrogate marker  
98 of muscle damage [28]. Collectively, we tested our hypotheses that there would be no significant  
99 association between head impact kinematics and physiological factors (EPOC and CK-MM),  
100 while there would be a significant association between EPOC values and creatine kinase levels.

101

## 102 **Materials and methods**

### 103 **Participants**

104         Seventeen high school football players at Irvington High School of the National  
105 Federation of State High School Associations (NFHS) volunteered for this study. The study was  
106 conducted during the 2017 football season, including a preseason physical examination on July  
107 18, 2017, five in-season games (September 22, October 16, 20, and 28, and November 4, 2017),  
108 and postseason follow-up (December 1, 2017; Fig 1). None of the 17 players were diagnosed  
109 with a concussion during the study period as confirmed by the team athletic trainer and physician.  
110 Inclusion criterion included being an active football team member. Exclusion criteria included a  
111 history of head and neck injury in the previous 1 year or neurological disorders. Two players  
112 actively withdrew within the first month, and their data were not included in the analyses. All  
113 participants and their legal guardians gave written informed consent, and the Washington  
114 Hospital Healthcare System Institutional Review Board approved the study.

115 ***Fig 1. Study Flow Chart.***

## 116 **Study procedures**

117           During the preseason physical examination, participants were custom-fitted with the  
118 Vector mouthguard (Athlete Intelligence, Kirkland, WA) that measured the number of hits and  
119 magnitude of head linear and rotational acceleration. Players wore the mouthguard for all  
120 practices and games from the beginning of the summer training camp (August 8, 2017) to the  
121 end of the season (November 11, 2017). Players were also fitted with a wireless chest-strap  
122 heart-rate monitor (Firstbeat Technologies, Jyväskylä, Finland) to record variability of heart rate  
123 during the five games. During the preseason baseline assessment, self-reported demographic  
124 information (age, height, weight, history of concussion, and years of American football  
125 experience) and blood samples were collected. There were no practices or games between the  
126 final day of the season (November 11, 2017) and post-season data collection (December 1, 2017).

127

## 128 **Head impact measurement**

129           This study used an instrumented Vector mouthguard for measuring linear and rotational  
130 head kinematics during impacts as previously described [7, 9, 26]. The mouthguard employs a  
131 triaxial accelerometer (ADXL377, Analog Devices, Norwood, MA) with 200 g maximum per  
132 axis to sense linear acceleration. For rotational kinematics, a triaxial gyroscope (L3GD20H, ST  
133 Microelectronics, Geneva, Switzerland) was employed. When a preset threshold for a peak linear  
134 acceleration (PLA) magnitude exceeded 10.0 g, 16 pre-trigger and 80 post-trigger samples with a  
135 standard hit duration of 93.75 milliseconds of all impact data were transmitted wirelessly through  
136 the antenna transmitter to the sideline antenna and computer, then stored on a secure internet  
137 database. The Vector mouthguard employs an in-mouth sensor to ensure that data acquisition  
138 occurs only when the mouthguard is securely fitted in one's mouth. From raw impact data

139 extracted from the server, the number of hits, PLA, and peak rotational acceleration (PRA) were  
140 used for further analyses. Four observations were consistent outliers on the number of hits, sum  
141 of PLA, and sum of PRA, exceeding at least 5.5 standard deviations above the mean. These  
142 observations were excluded from analysis (<2.5% of all data).

## 143 **Blood collection and creatine kinase measurements**

144 Blood samples were obtained from 12 time points. For the five game days, pre-game  
145 blood samples were collected four to five hours prior to competition to ensure no effect from pre-  
146 game warm up, and post-game blood samples were collected within one hour after the games. At  
147 each time point, four milliliters of venous blood samples were collected into red-cap serum  
148 vacutainer sterile tubes (BD Bioscience). Blood samples were allowed to clot at room  
149 temperature for a minimum of 30 minutes. Serum was separated by centrifugation (1500 x g, 15  
150 min) and stored at -80°C until analysis. CK-MM measurements were performed using sandwich-  
151 based enzyme-linked immunosorbent assay (ELISA) kits (LifeSpan Biosciences Inc., Seattle,  
152 WA). The lowest detection limit of the assay is 0.94 ng/mL, and the assay covers a concentration  
153 range up to 100 ng/mL with a typical intra-assay precision of <6.8% and an inter-assay precision  
154 of <5.3%. One hundred microliters of serum samples were loaded in duplicate into the ELISA  
155 plate. Fluorescent signals measured by a micro-plate reader (BioTek EL800, Winooski, VT)  
156 were converted into ng/mL as per standard curve concentrations. The experimenter performing  
157 the assay was blinded from subject information.

## 158 **Physiological load measure**

159 EPOC can be estimated by  $VO_2$  levels and duration of the activity:  $EPOC (ml/kg) =$   
160  $(\text{mean } VO_{2 \text{ recovery}} \times \text{time}_{\text{recovery}}) - (VO_{2 \text{ baseline}} \times \text{time}_{\text{recovery}})$ . To maximize clinical application,  
161 instead of  $VO_2$ , researchers have validated an EPOC measurement using  $\%HR_{\text{maximum}}$ , time, and

162 heart rate variability, which yielded a substantial agreement with  $\text{VO}_2$ -derived EPOC (range of  
163  $R^2$ : 0.79 – 0.87) [29, 30]. Players in this study wore chest-strap HR monitors from pre-game  
164 warm up until approximately 1h post-game. Peak EPOC values were not utilized because EPOC  
165 declines over time and not necessarily in a linear fashion. Thus, the mean EPOC value from each  
166 game was assessed for each player using Firstbeat PRO heartbeat analysis software version 1.4.1  
167 and included in analyses.

## 168 **Statistical analysis**

169 A repeated measures analysis of variance was used to test whether EPOC and CK-MM  
170 varied across five games, as well as between pre- and post-games for CK-MM levels. Mixed-  
171 effect regression modeling (MRM) was performed using physiological factors (EPOC and CK-  
172 MM changes between pre- and post-games) and three head impact kinematics (PLA, PRA and  
173 head impact counts) in each game as primary outcomes. All the models were adjusted by  
174 cumulative frequency and magnitude of head impacts up to each game (from previous games and  
175 practices). Pre-season baseline CK-MM level and a pre-game CK-MM level were additionally  
176 adjusted for in the models that used CK-MM change as an outcome. Furthermore, to examine  
177 whether physical exertion and muscle damage parameters were correlated with one another, the  
178 potential correlation between EPOC and acute changes in CK-MM levels between pre- and post-  
179 games was assessed using MRM where CK-MM change as the outcome and EPOC as a primary  
180 predictor. The model was adjusted by pre-season baseline CK-MM level and pre-game CK-MM  
181 level. All analyses were conducted using statistical software R (version 3.4.1) with package  
182 ‘nlme’.

183

## 184 **Results**



## 185 **Demographics and head impact kinematics**

186 A total of 9,700 hits, 214,492 g, and 19,885,037 rad/s<sup>2</sup> were recorded from 15 players  
 187 during pre-season training camp, in-season, and post-season stages, collectively. Demographic  
 188 characteristics and median values of impact kinematics are summarized in Table 1. Please refer  
 189 to Supplementary Table 1 for the impact data from each game.

| <b>Table 1. Demographics and head impact kinematics.</b>                                                                                                                                                                                                                                                                                        |                                |
|-------------------------------------------------------------------------------------------------------------------------------------------------------------------------------------------------------------------------------------------------------------------------------------------------------------------------------------------------|--------------------------------|
| <b>Variables</b>                                                                                                                                                                                                                                                                                                                                | <b>Team (n=15)</b>             |
| <b>Demographics, M (SD)</b>                                                                                                                                                                                                                                                                                                                     |                                |
| Age, y                                                                                                                                                                                                                                                                                                                                          | 16.4 (0.5)                     |
| Body Mass Index, kg/m <sup>2</sup>                                                                                                                                                                                                                                                                                                              | 28.0 (4.0)                     |
| Years Football Experience                                                                                                                                                                                                                                                                                                                       | 3.13 (1.5)                     |
| Number of previous concussions                                                                                                                                                                                                                                                                                                                  | 0.47 (0.6)                     |
| 0                                                                                                                                                                                                                                                                                                                                               | 9*                             |
| 1                                                                                                                                                                                                                                                                                                                                               | 5*                             |
| 2                                                                                                                                                                                                                                                                                                                                               | 1*                             |
| <b>Position, n (%)</b>                                                                                                                                                                                                                                                                                                                          |                                |
| Linemen (OL, DL)                                                                                                                                                                                                                                                                                                                                | 6 (37.5)                       |
| Linebacker, Tight End,                                                                                                                                                                                                                                                                                                                          | 2 (18.7)                       |
| Skill Players (WR, DB, RB)                                                                                                                                                                                                                                                                                                                      | 7 (43.8)                       |
| <b>Impact Kinematics for Season, median (IQR)<sup>†</sup></b>                                                                                                                                                                                                                                                                                   |                                |
| Total number of hits                                                                                                                                                                                                                                                                                                                            | 596 (361.5 – 981.5)            |
| Sum of PLA, g                                                                                                                                                                                                                                                                                                                                   | 11,907 (7,644 – 21,014)        |
| Sum of PRA, rad/sec <sup>2</sup>                                                                                                                                                                                                                                                                                                                | 1,202,758 (637,515 – 210,0871) |
| Note: IQR, interquartile range. SD, standard deviation. OL, offensive lineman. DL, defensive<br>lineman. WR, wide receiver. DB, defensive back. RB, running back. PLA, peak linear<br>acceleration. PRA, peak rotational acceleration.<br>*number of players, <sup>†</sup> see supplemental table 1 for impact kinematics from individual games |                                |

## 190 **Patterns of EPOC and creatine kinase changes across five games**

191 In the overall sample, repeated measures ANOVA indicated that there was no difference in  
 192 EPOC between games, as illustrated by a statistically non-significant time effect,  $F(1,46)=1.213$ ,  
 193  $p=0.277$ . Likewise, there was no significant change in serum CK-MM levels across study time  
 194 points,  $F(1,48)=0.495$ ,  $p=0.485$  (Table 2).

| <b>Table 2. Means and standard deviations of EPOC and CK-MM across five football games.</b> |                  |                  |                  |                  |                  |                  |                  |                  |                  |                  |
|---------------------------------------------------------------------------------------------|------------------|------------------|------------------|------------------|------------------|------------------|------------------|------------------|------------------|------------------|
|                                                                                             | Game 1           |                  | Game 2           |                  | Game 3           |                  | Game 4           |                  | Game 5           |                  |
| EPOC <sup>a</sup>                                                                           | 17.25 (18.85)    |                  | 13.45 (12.81)    |                  | 28.43 (22.74)    |                  | 25.98 (33.73)    |                  | 14.57 (9.724)    |                  |
| CK-MM <sup>b</sup>                                                                          | Pre              | Post             | Pre              | Post             | Pre              | Post             | Pre              | Post             | Pre              | Post             |
|                                                                                             | 7.893<br>(6.641) | 9.184<br>(5.815) | 12.47<br>(6.000) | 13.39<br>(7.362) | 8.010<br>(5.745) | 9.879<br>(5.133) | 7.338<br>(3.217) | 9.822<br>(4.360) | 9.195<br>(4.330) | 12.06<br>(7.106) |

Note: EPOC, excess post-exercise oxygen consumption; CK-MM, creatine kinase muscle specific isoenzyme.  
<sup>a</sup>mL/kg, expressed as mean (SD)  
<sup>b</sup>ng/mL, expressed as mean (SD)

195

## 196 **Association between physiological factors and head impact**

### 197 **kinematics**

198 Mixed-effect regression models indicated that head impact kinematics (frequency, PLA,  
 199 PRA) were significantly positively associated with CK-MM increase (Fig 2), but not with EPOC  
 200 (Table 3). For example, the model estimated that CK-MM at post-game would increase by 0.06  
 201 ng/mL (SE=0.03) for each additional head impact sustained during a game. There was a  
 202 significant positive association between EPOC and CK-MM increase ( $\beta=0.07$ , SE=0.025,  
 203  $P=0.009$ ; Fig 3).

204 **Fig 2. Association between Change in CK-MM and Head Impact Kinematics.** *The change in*  
 205 *CK-MM from pre- to post- game was significantly associated with the frequency of hits (Panel*  
 206 *A;  $\beta=0.06$ , SE=0.029,  $P=0.041$ ), the sum of peak linear acceleration sustained during the game*

207 (Panel B;  $\beta=0.003$ ,  $SE=0.001$ ,  $P=0.031$ ), and the sum of the peak rotational acceleration of  
 208 impacts sustained during the game (Panel C;  $\beta=0.029$ ,  $SE=0.013$ ,  $P=0.029$ ).

209 **Fig 3. Association between Change in CK-MM and EPOC.** There was a significant positive  
 210 association between the EPOC and the change in CK-MM from pre- to post-game ( $\beta=0.07$ ,  
 211  $SE=0.025$ ,  $P=0.009$ ).

212 **Table 3. Results from mixed-effects regression models**

|                                             | Increase in CK-MM (ng/mL) |         |
|---------------------------------------------|---------------------------|---------|
|                                             | Estimate (SE)             | P-value |
| <b>In-game head impact count (times)</b>    | 0.06 (0.029)              | 0.041   |
| <b>In-game PLA (g)</b>                      | 0.003 (0.001)             | 0.031   |
| <b>In-game PRA (rad/s<sup>2</sup>)/1000</b> | 0.029 (0.013)             | 0.029   |
|                                             | EPOC (mL/kg)              |         |
|                                             | Estimate (SE)             | P-value |
| <b>In-game head impact count (times)</b>    | 0.073 (0.17)              | 0.672   |
| <b>In-game PLA (g)</b>                      | 0.001 (0.007)             | 0.882   |
| <b>In-game PRA (rad/s<sup>2</sup>)/1000</b> | 0.008 (0.076)             | 0.918   |

Note. PLA, peak linear acceleration; PRA, peak rotational acceleration; CK-MM, creatine kinase skeletal muscle isoenzyme; EPOC, excess post-exercise oxygen consumption.

213

## 214 Discussion

215 In the present study, we assessed two of the most practical physiological variables,  
 216 physical exertion and muscle damage, and examined their association with head impact  
 217 frequency and magnitude sustained during football games. To the best of our knowledge, this is  
 218 the first and most comprehensive clinical study to suggest the potential tri-linkage among head  
 219 impact kinematics, muscle damage, and physical exertion. There were three chief findings from  
 220 the present study: 1) physical exertion levels as measured by EPOC were not associated with

221 frequency and magnitude of head impacts sustained during games, 2) muscle damage as assessed  
222 by CK-MM was significantly and positively associated with head impact frequency and  
223 magnitude, and 3) there was a significant positive association between muscle damage and  
224 physical exertion measures.

225         The most meaningful implication of this study is that it may be unnecessary to account  
226 for physical exertion effects in subconcussion studies. This information is significant for existing  
227 literature that failed to measure physical exertion variables [7, 10, 13, 14, 16, 17, 31], as well as  
228 planning for future studies, given the limited feasibility of heart rate monitor usage by athletes.  
229 Contrarily, we highly encourage researchers to account for muscle damage effects, especially for  
230 studies using outcome variables that can be influenced by muscle damage, such as inflammatory  
231 markers, brain-enriched factors that are expressed, albeit low level, within skeletal muscle (i.e.,  
232 S100B), and balance assessment. This recommendation is supported by our novel and  
233 unexpected finding that there was a significant positive association between serum CK-MM  
234 levels and head impact kinematics, which necessitates a brief review of the mechanism by which  
235 CK-MM is released into the bloodstream.

236         CK-MM is constitutively localized to the M-line of sarcomeres in muscle fibers and  
237 facilitates the regeneration of adenosine triphosphate (ATP) for muscle fibers [32]. Traumatic  
238 stress and/or mechanical stress to the sarcomere can disrupt the contractile apparatus, muscle  
239 cytoskeleton, and myofibrillary enzymes such as CK-MM. The dislodged CK-MM can  
240 translocate into the extracellular space and then to the bloodstream [33]. Resistance exercise,  
241 particularly eccentric action like biceps curls and leg presses, has consistently shown to increase  
242 serum levels of CK-MM. Ehlers et al. reported that a two-a-day practice in college American  
243 football players elevated serum CK levels 15-fold [34], supporting the strenuous nature of

244 American football and its highest rate of musculoskeletal injury of any team sport [35]. Although  
245 our sample showed lesser magnitudes of acute CK-MM increases than the Ehlers et al. [34], our  
246 data indicate that those who sustained greater frequency and magnitude of head impacts are  
247 likely to experience greater muscle damage as reflected by increased serum CK-MM levels.  
248 Some may claim that this observation is as expected, given that the more plays in which an  
249 athlete participates, the more likely he/she triggers explosive muscle contraction to block, sprint,  
250 and/or tackle, resulting in a greater chance of sustaining subconcussive head impacts. Playing  
251 positions may provide a clearer interpretation of the data, since play style and frequency of head  
252 impacts [1] are largely dependent on players' position. However, due to small sample size and  
253 some subjects participating in both defensive and offensive plays, we were unable to conduct  
254 such a position dependent analysis.

255 A perplexing aspect of the results was that the head impact kinematics were significantly  
256 associated with CK-MM levels but not with EPOC values, despite these two physiological  
257 variables being significantly correlated with one another. Similar to CK-MM, EPOC is  
258 particularly sensitive to anaerobic exercise, such that a high-intensity resistance exercise has  
259 shown to exhibit the greatest increase in EPOC, whereas smaller increases in EPOC have been  
260 documented after a long duration of aerobic exercise [27]. American football is comprised of  
261 frequent bouts of anaerobic exercise, supporting the appropriate use of EPOC in understanding  
262 physical exertion load. A new hypothesis generated by this independent relationship between  
263 EPOC and head impact kinematics is that an EPOC value is relatively consistent across plays,  
264 while head impact occurrence is subject to several factors. Previous research has shown that  
265 impact incidence among American football players is skewed, with lineman (defensive and  
266 offensive) and linebackers recording the greatest frequency of head impacts during both games

267 and practices [36]. These findings underpin common speculation that “the box” encompassing  
268 the aforementioned positions subjects players to frequent head insults. Additionally, the primary  
269 emphasis of American football is to tackle the individual who possesses the football, therefore  
270 the risk of head impact seemingly shifts drastically towards the ball carrier, relieving others of  
271 harm. Lastly, regardless of player position (inside or outside the box) or frequency of possessing  
272 the football, it is understood that all players engage in high intensity anaerobic activity each play,  
273 thus creating a uniform rate of physiological demand that is independent of head impact  
274 kinematics. It is important to note that our available data cannot rigorously test this speculation,  
275 which warrants further investigation to include other physiological factors such as running  
276 velocity, blood flow velocity, and PaO<sub>2</sub>.

277 The impact of these results is limited by several factors. The study cohort was comprised of a  
278 small number of male, adolescent football players. Therefore, generalizability of the results  
279 should only be limited to the football cohort at best. It remains unclear whether a similar  
280 observation may be present in females and in other contact sports (i.e., soccer, ice hockey,  
281 boxing). Importantly, this is the first field study to measure and comprehensibly test the  
282 relationship between physiological variables and subconcussive head impacts across an entire  
283 high school season of American football.

284

## 285 **Conclusions**

286 We sought to determine the relationship between two physiological variables, CK-MM and  
287 EPOC, and subconcussive head impacts, as the effect of exercise is often not accounted for or is  
288 cited as an unknown quantity in studies of subconcussive head impacts. Data suggest that the  
289 variable of physical exertion (EPOC) was independent from subconcussive head impacts.

290 However, we identified that serum levels of CK-MM, reflecting muscle damage, raised  
291 concomitantly with the frequency and magnitude of head impacts sustained during football  
292 games. This study proved the feasibility of such physiological measurements. However, the data  
293 indicate that it may be unnecessary to account for physical exertion effect in subconcussion  
294 studies. Conversely, future study designs should include measures of muscular damage in order  
295 to distinguish the effects between muscle damage and subconcussive head impacts.

296

## 297 **Acknowledgments**

298 Authors would like to thank Ms. Ciara Fulgar and Ms. Carmen Charleston for their  
299 assistance in data collection. Authors also would like to thank Ms. Michelle Stone, Ms. Lamiya  
300 Sheikh, Ms. Kimberly Hartz for their administrative assistance. Additionally, authors would like  
301 to acknowledge Ms. Niyati Patel, CMA CPC, Mr. Jacob Geier, Ms. Yesenia Galea, MA, CP-II,  
302 Ms. Renae Mullins, CMA, Ms. Vanquynh Pham, RN, FNP, Ms. Annalisa Rocha, Mr. Baldeep  
303 Bajwa, CPC, Ms. Leanne Saud, Ms. Cassandra Manuel, RN, and Ms. Laura Constantine in  
304 administration and blood sample collection.

305

## 306 **References**

- 307 1. Bailes JE, Petraglia AL, Omalu BI, Nauman E, Talavage T. Role of subconcussion in  
308 repetitive mild traumatic brain injury. *Journal of neurosurgery*. 2013;119(5):1235-45. Epub  
309 2013/08/27. doi: 10.3171/2013.7.JNS121822. PubMed PMID: 23971952.
- 310 2. Montenigro PH, Alosco ML, Martin BM, Daneshvar DH, Mez J, Chaisson CE, et al.  
311 Cumulative Head Impact Exposure Predicts Later-Life Depression, Apathy, Executive

- 312 Dysfunction, and Cognitive Impairment in Former High School and College Football Players.  
313 Journal of neurotrauma. 2017;34(2):328-40. doi: 10.1089/neu.2016.4413. PubMed PMID:  
314 27029716; PubMed Central PMCID: PMC5220530.
- 315 3. Lipton ML, Kim N, Zimmerman ME, Kim M, Stewart WF, Branch CA, et al. Soccer heading  
316 is associated with white matter microstructural and cognitive abnormalities. Radiology.  
317 2013;268(3):850-7. doi: 10.1148/radiol.13130545. PubMed PMID: 23757503; PubMed Central  
318 PMCID: PMC3750422.
- 319 4. McKee AC, Stern RA, Nowinski CJ, Stein TD, Alvarez VE, Daneshvar DH, et al. The  
320 spectrum of disease in chronic traumatic encephalopathy. Brain : a journal of neurology.  
321 2013;136(Pt 1):43-64. Epub 2012/12/05. doi: 10.1093/brain/awt307. PubMed PMID: 23208308;  
322 PubMed Central PMCID: PMC3624697.
- 323 5. Mez J, Daneshvar DH, Kiernan PT, Abdolmohammadi B, Alvarez VE, Huber BR, et al.  
324 Clinicopathological Evaluation of Chronic Traumatic Encephalopathy in Players of American  
325 Football. Jama. 2017;318(4):360-70. doi: 10.1001/jama.2017.8334. PubMed PMID: 28742910.
- 326 6. Hwang S, Ma L, Kawata K, Tierney R, Jeka JJ. Vestibular Dysfunction after Subconcussive  
327 Head Impact. J Neurotrauma. 2017;34(1):8-15. Epub 2016/02/18. doi: 10.1089/neu.2015.4238.  
328 PubMed PMID: 26885560; PubMed Central PMCID: PMC5198105.
- 329 7. Kawata K, Rubin LH, Lee JH, Sim T, Takahagi M, Szwanki V, et al. Association of Football  
330 Subconcussive Head Impacts With Ocular Near Point of Convergence. JAMA Ophthalmol.  
331 2016;134(7):763-9. Epub 2016/06/04. doi: 10.1001/jamaophthalmol.2016.1085. PubMed PMID:  
332 27257799.



- 333 8. Kawata K, Tierney R, Phillips J, Jeka JJ. Effect of Repetitive Sub-concussive Head Impacts  
334 on Ocular Near Point of Convergence. *Int J Sports Med.* 2016;37(5):405-10. Epub 2016/02/10.  
335 doi: 10.1055/s-0035-1569290. PubMed PMID: 26859643.
- 336 9. Kawata K, Rubin LH, Takahagi M, Lee JH, Sim T, Szwanki V, et al. Subconcussive Impact-  
337 Dependent Increase in Plasma S100beta Levels in Collegiate Football Players. *J Neurotrauma.*  
338 2017;34(14):2254-60. Epub 2017/02/10. doi: 10.1089/neu.2016.4786. PubMed PMID: 28181857.
- 339 10. Oliver JM, Jones MT, Kirk KM, Gable DA, Repshas JT, Johnson TA, et al. Serum  
340 Neurofilament Light in American Football Athletes over the Course of a Season. *J Neurotrauma.*  
341 2016;33(19):1784-9. Epub 2015/12/25. doi: 10.1089/neu.2015.4295. PubMed PMID: 26700106.
- 342 11. Bahrami N, Sharma D, Rosenthal S, Davenport EM, Urban JE, Wagner B, et al.  
343 Subconcussive Head Impact Exposure and White Matter Tract Changes over a Single Season of  
344 Youth Football. *Radiology.* 2016;281(3):919-26. doi: 10.1148/radiol.2016160564. PubMed  
345 PMID: 27775478; PubMed Central PMCID: PMC5131834.
- 346 12. Slobounov SM, Walter A, Breiter HC, Zhu DC, Bai X, Bream T, et al. The effect of  
347 repetitive subconcussive collisions on brain integrity in collegiate football players over a single  
348 football season: A multi-modal neuroimaging study. *Neuroimage Clin.* 2017;14:708-18. Epub  
349 2017/04/11. doi: 10.1016/j.nicl.2017.03.006. PubMed PMID: 28393012; PubMed Central  
350 PMCID: PMC5377433.
- 351 13. Di Battista AP, Rhind SG, Richards D, Churchill N, Baker AJ, Hutchison MG. Altered Blood  
352 Biomarker Profiles in Athletes with a History of Repetitive Head Impacts. *PloS one.*  
353 2016;11(7):e0159929. Epub 2016/07/28. doi: 10.1371/journal.pone.0159929. PubMed PMID:  
354 27458972; PubMed Central PMCID: PMC4961456.

- 355 14. Shahim P, Tegner Y, Wilson DH, Randall J, Skillback T, Pazooki D, et al. Blood biomarkers  
356 for brain injury in concussed professional ice hockey players. *JAMA Neurol.* 2014;71(6):684-92.  
357 Epub 2014/03/15. doi: 10.1001/jamaneurol.2014.367. PubMed PMID: 24627036.
- 358 15. Gill J, Merchant-Borna K, Jeromin A, Livingston W, Bazarian J. Acute plasma tau relates to  
359 prolonged return to play after concussion. *Neurology.* 2017;88(6):595-602. doi:  
360 10.1212/WNL.0000000000003587. PubMed PMID: 28062722; PubMed Central PMCID:  
361 PMC5304458.
- 362 16. Shahim P, Zetterberg H, Tegner Y, Blennow K. Serum neurofilament light as a biomarker for  
363 mild traumatic brain injury in contact sports. *Neurology.* 2017;88(19):1788-94. Epub 2017/04/14.  
364 doi: 10.1212/WNL.0000000000003912. PubMed PMID: 28404801; PubMed Central PMCID:  
365 PMC5419986.
- 366 17. Marchi N, Bazarian JJ, Puvenna V, Janigro M, Ghosh C, Zhong J, et al. Consequences of  
367 repeated blood-brain barrier disruption in football players. *PLoS One.* 2013;8(3):e56805. Epub  
368 2013/03/14. doi: 10.1371/journal.pone.0056805. PubMed PMID: 23483891; PubMed Central  
369 PMCID: PMC3590196.
- 370 18. Pyke F. Body temperature regulation in summer football. *Sports Coach.* 1980;4:41-3.
- 371 19. Sakurai A, Atkins CM, Alonso OF, Bramlett HM, Dietrich WD. Mild hyperthermia worsens  
372 the neuropathological damage associated with mild traumatic brain injury in rats. *Journal of*  
373 *neurotrauma.* 2012;29(2):313-21. Epub 2011/10/27. doi: 10.1089/neu.2011.2152. PubMed  
374 PMID: 22026555; PubMed Central PMCID: PMC3261791.
- 375 20. Abd-Elfattah HM, Abdelazeim FH, Elshennawy S. Physical and cognitive consequences of  
376 fatigue: A review. *J Adv Res.* 2015;6(3):351-8. Epub 2015/08/11. doi:

- 377 10.1016/j.jare.2015.01.011. PubMed PMID: 26257932; PubMed Central PMCID:  
378 PMCPMC4522584.
- 379 21. Anderson RE, Hansson LO, Nilsson O, Dijlai-Merzoug R, Settergren G. High serum S100B  
380 levels for trauma patients without head injuries. *Neurosurgery*. 2001;48(6):1255-8. doi: Doi  
381 10.1097/00006123-200106000-00012. PubMed PMID: ISI:000168785500032.
- 382 22. Otto M, Holthusen S, Bahn E, Sohnchen N, Wiltfang J, Geese R, et al. Boxing and running  
383 lead to a rise in serum levels of S-100B protein. *International journal of sports medicine*.  
384 2000;21(8):551-5. Epub 2001/01/13. doi: 10.1055/s-2000-8480. PubMed PMID: 11156273.
- 385 23. Khan MA, Moiz JA, Raza S, Verma S, Shareef MY, Anwer S, et al. Physical and balance  
386 performance following exercise induced muscle damage in male soccer players. *J Phys Ther Sci*.  
387 2016;28(10):2942-9. Epub 2016/11/09. doi: 10.1589/jpts.28.2942. PubMed PMID: 27821967;  
388 PubMed Central PMCID: PMCPMC5088158.
- 389 24. Higgins M, Halstead PD, Snyder-Mackler L, Barlow D. Measurement of impact acceleration:  
390 mouthpiece accelerometer versus helmet accelerometer. *Journal of athletic training*.  
391 2007;42(1):5-10. Epub 2007/06/29. PubMed PMID: 17597937; PubMed Central PMCID:  
392 PMC1896070.
- 393 25. Camarillo DB, Shull PB, Mattson J, Shultz R, Garza D. An instrumented mouthguard for  
394 measuring linear and angular head impact kinematics in American football. *Ann Biomed Eng*.  
395 2013;41(9):1939-49. Epub 2013/04/23. doi: 10.1007/s10439-013-0801-y. PubMed PMID:  
396 23604848; PubMed Central PMCID: PMC3954756.
- 397 26. Wu LC, Nangia V, Bui K, Hammoor B, Kurt M, Hernandez F, et al. In Vivo Evaluation of  
398 Wearable Head Impact Sensors. *Ann Biomed Eng*. 2015. Epub 2015/08/21. doi:  
399 10.1007/s10439-015-1423-3. PubMed PMID: 26289941.

- 400 27. Borsheim E, Bahr R. Effect of exercise intensity, duration and mode on post-exercise oxygen  
401 consumption. *Sports Med.* 2003;33(14):1037-60. Epub 2003/11/06. PubMed PMID: 14599232.
- 402 28. Baird MF, Graham SM, Baker JS, Bickerstaff GF. Creatine-kinase- and exercise-related  
403 muscle damage implications for muscle performance and recovery. *J Nutr Metab.*  
404 2012;2012:960363. Epub 2012/01/31. doi: 10.1155/2012/960363. PubMed PMID: 22288008;  
405 PubMed Central PMCID: PMC3263635.
- 406 29. Rusko HK, Pulkkinen A, Saalasti S, Hynynen E, Kettunen J. Pre-prediction of EPOC: A tool  
407 for monitoring fatigue accumulation during exercise? *Med Sci Sport Exer.* 2003;35:S183.
- 408 30. Smolander J, Ajoviita M, Juuti T, Nummela A, Rusko H. Estimating oxygen consumption  
409 from heart rate and heart rate variability without individual calibration. *Clin Physiol Funct*  
410 *Imaging.* 2011;31(4):266-71. Epub 2011/06/16. doi: 10.1111/j.1475-097X.2011.01011.x.  
411 PubMed PMID: 21672133.
- 412 31. Gill J, Merchant-Borna K, Jeromin A, Livingston W, Bazarian J. Acute plasma tau relates to  
413 prolonged return to play after concussion. *Neurology.* 2017. doi:  
414 10.1212/WNL.0000000000003587. PubMed PMID: 28062722.
- 415 32. Wallimann T, Schlosser T, Eppenberger HM. Function of M-line-bound creatine kinase as  
416 intramyofibrillar ATP regenerator at the receiving end of the phosphorylcreatine shuttle in  
417 muscle. *The Journal of biological chemistry.* 1984;259(8):5238-46. Epub 1984/04/25. PubMed  
418 PMID: 6143755.
- 419 33. Friden J, Lieber RL. Eccentric exercise-induced injuries to contractile and cytoskeletal  
420 muscle fibre components. *Acta Physiol Scand.* 2001;171(3):321-6. Epub 2001/06/20. doi:  
421 10.1046/j.1365-201x.2001.00834.x. PubMed PMID: 11412144.

- 422 34. Ehlers GG, Ball TE, Liston L. Creatine Kinase Levels are Elevated During 2-A-Day  
423 Practices in Collegiate Football Players. *Journal of athletic training*. 2002;37(2):151-6. Epub  
424 2003/08/26. PubMed PMID: 12937428; PubMed Central PMCID: PMCPMC164338.
- 425 35. Rechel JA, Yard EE, Comstock RD. An epidemiologic comparison of high school sports  
426 injuries sustained in practice and competition. *Journal of athletic training*. 2008;43(2):197-204.  
427 Epub 2008/03/18. doi: 10.4085/1062-6050-43.2.197. PubMed PMID: 18345346; PubMed  
428 Central PMCID: PMCPMC2267335.
- 429 36. Crisco JJ, Fiore R, Beckwith JG, Chu JJ, Brolinson PG, Duma S, et al. Frequency and  
430 location of head impact exposures in individual collegiate football players. *Journal of athletic*  
431 *training*. 2010;45(6):549-59. Epub 2010/11/11. doi: 10.4085/1062-6050-45.6.549. PubMed  
432 PMID: 21062178; PubMed Central PMCID: PMC2978006.

433

## 434 **Supporting information**

435 **S1 Table. Impact kinematics for individual games.**

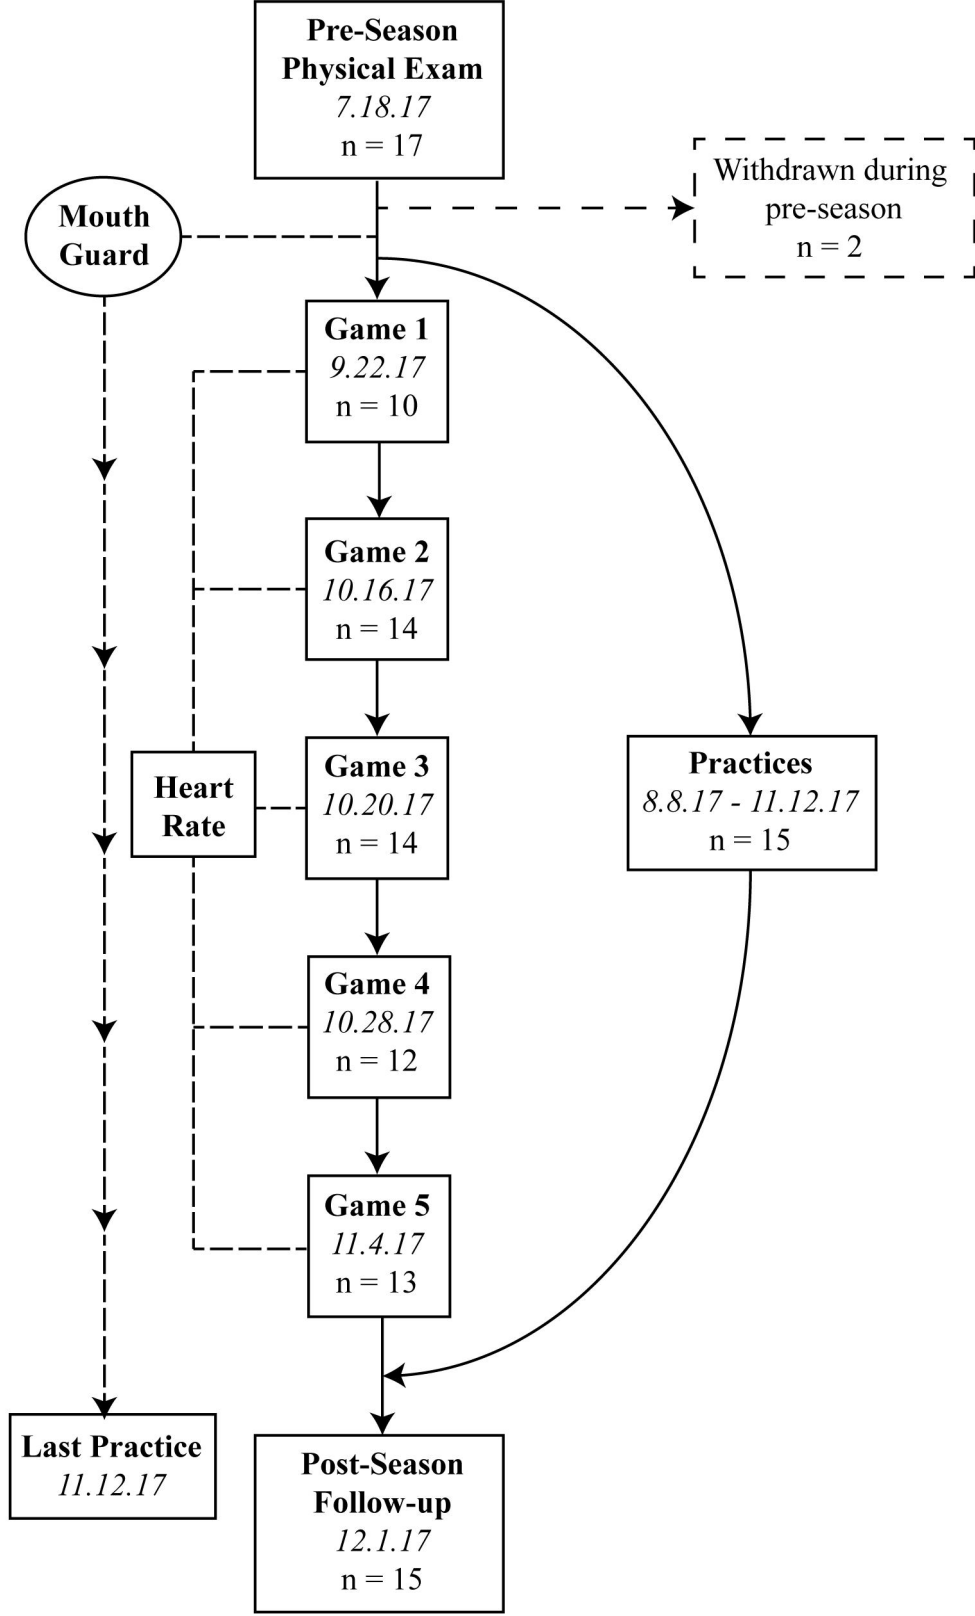

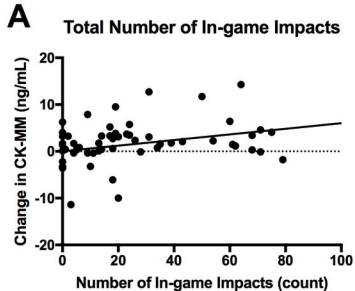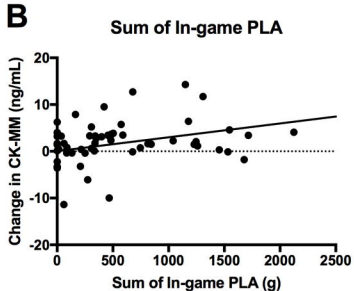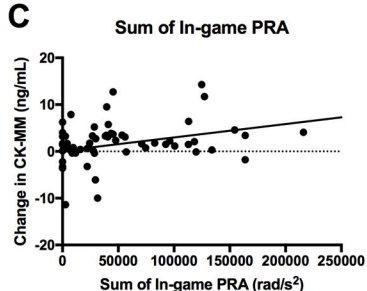

Source: https://www.biorxiv.org/content/10.1101/493700v1.full.pdf
